# Supplementary material
Source: MDPI journal article supplement (https://www.mdpi.com/2220-9964/11/4/242)
Supplement: s1 [file s1]

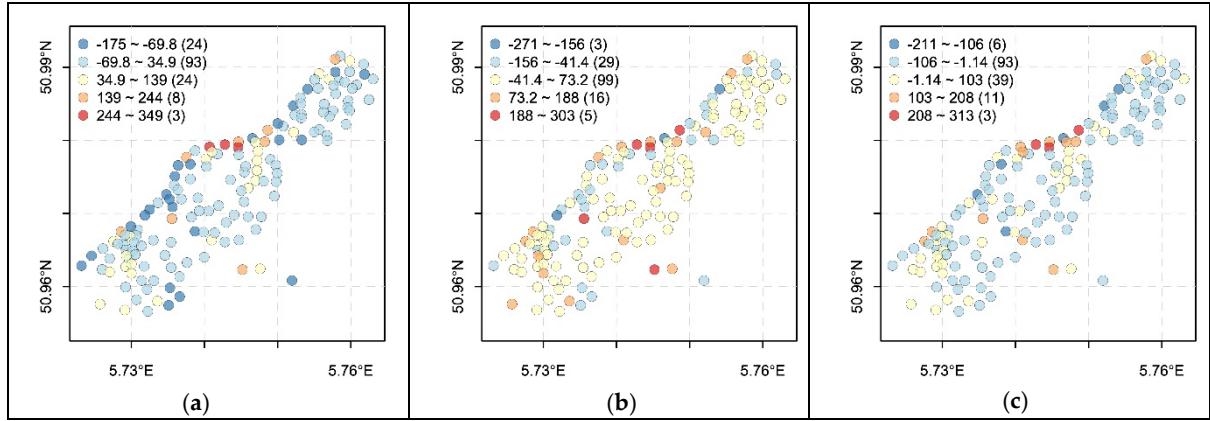

**Figure S1.** Meuse dataset, model residuals: (a) Non-spatial model, (b) spatial-lag model, (c) ESF model.

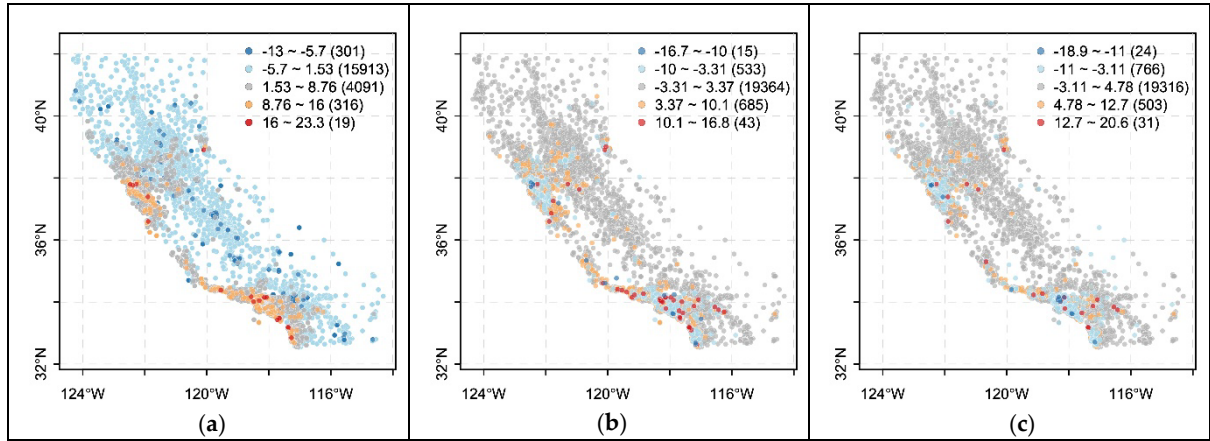

**Figure S2.** California dataset, model residuals: (a) Non-spatial model, (b) spatial-lag model, (c) ESF model.
